# Supplementary material
Source: publisher figshare collection journal article supplement (https://frontiersin.figshare.com/ndownloader/files/23042921)

NHE1

WB

INPUT

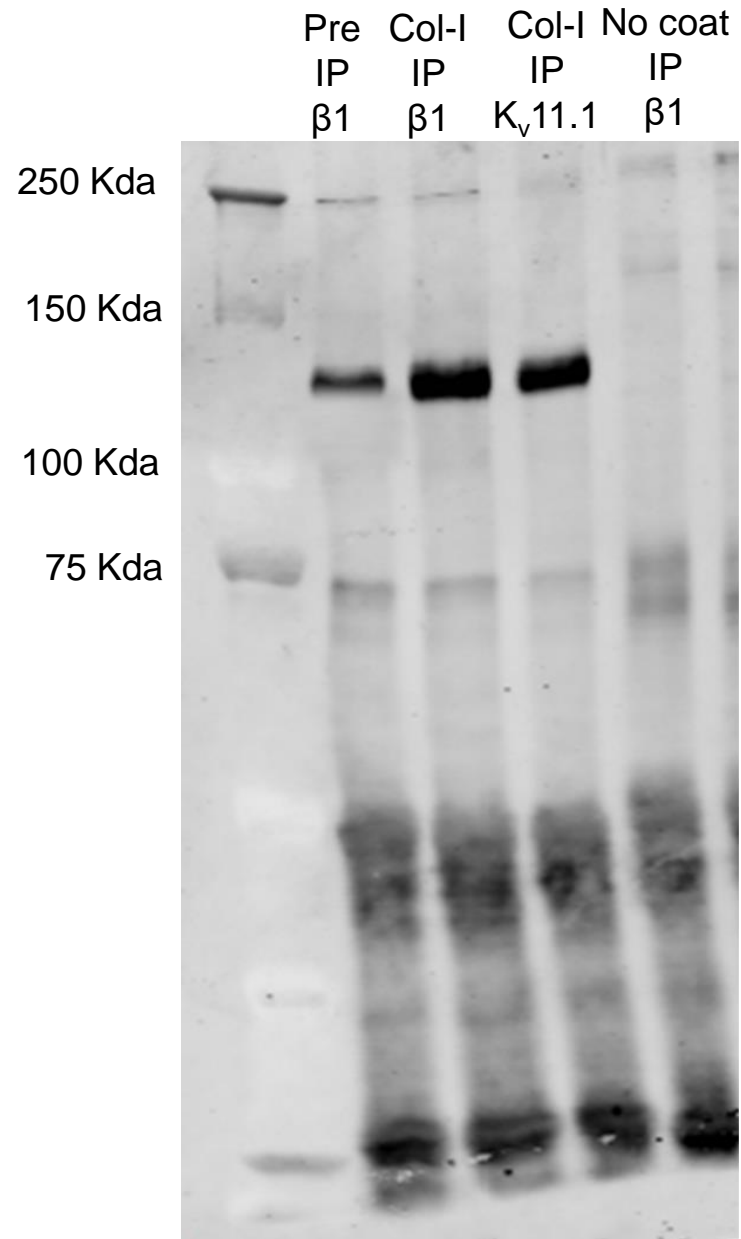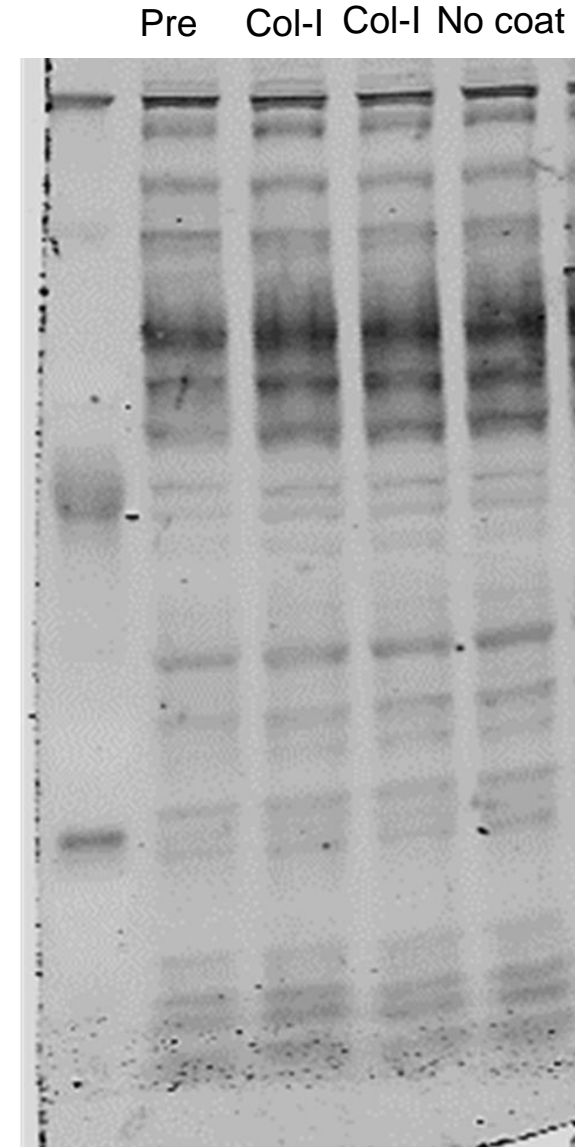

K<sub>v</sub>11.1

WB

INPUT

Pre Col-I Col-I No coat  
IP IP IP IP  
 $\beta$ 1  $\beta$ 1 K<sub>v</sub>11.1  $\beta$ 1

Pre Col-I Col-I No coat

250 Kda

150 Kda

100 Kda

75 Kda

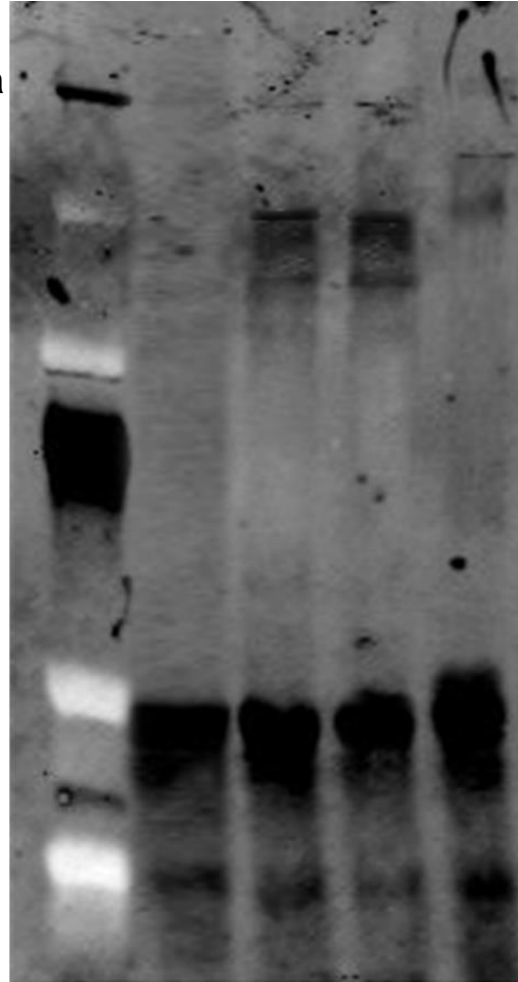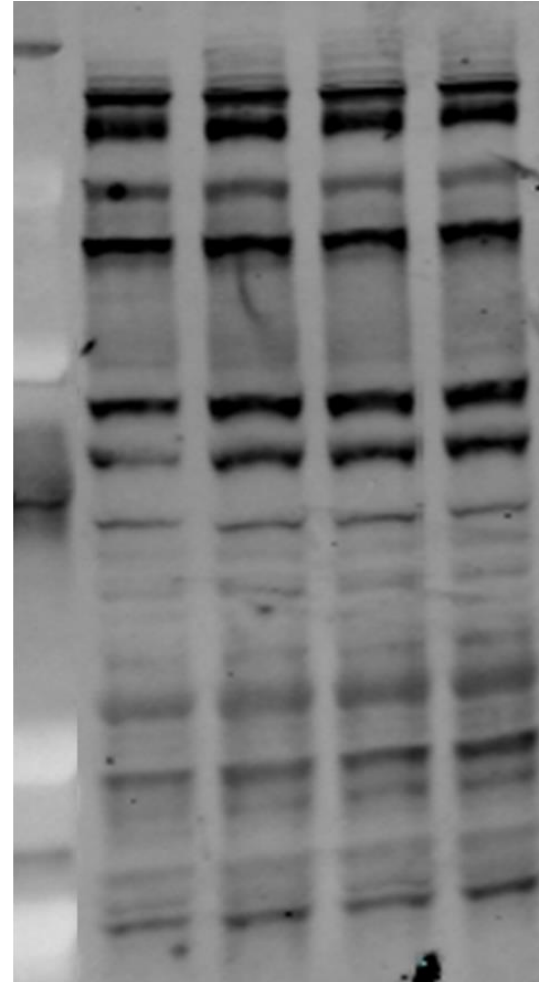

# $\beta$ 1-Integrin

WB

INPUT

Pre Col-I Col-I No coat  
IP IP IP IP  
 $\beta$ 1  $\beta$ 1  $K_v11.1$   $\beta$ 1

Pre Col-I Col-I No coat

250 Kda

150 Kda

100 Kda

75 Kda

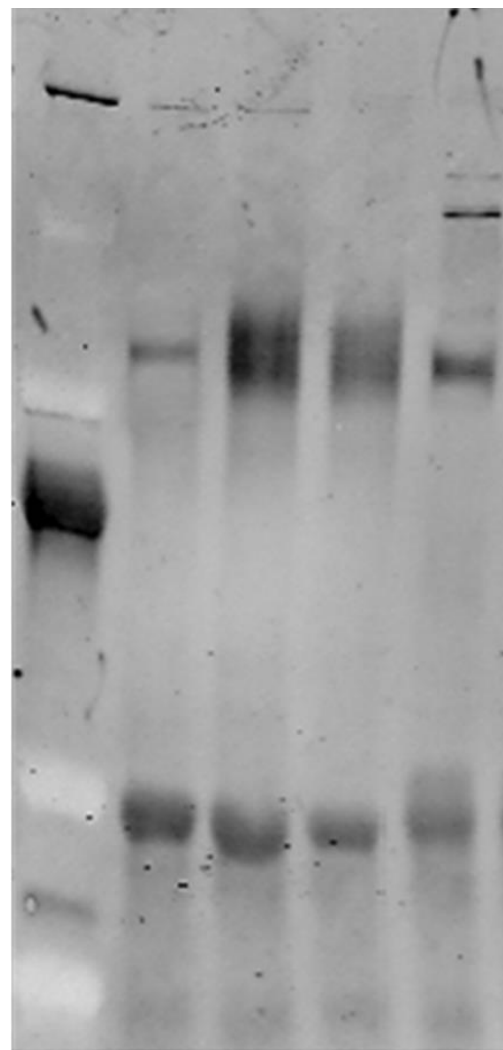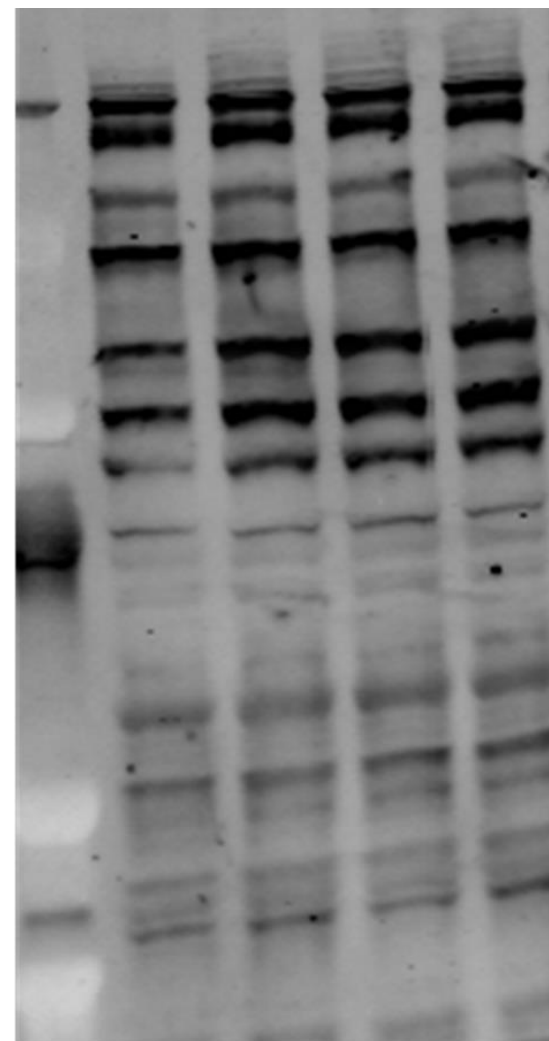

Supplement: Supplementary file 1 [file 23042921]
